# Supplementary material for: miR-BAG: Bagging Based Identification of MicroRNA Precursors
Source: PLoS One. 2012 Sep 25;7(9):e45782. doi: 10.1371/journal.pone.0045782 (PMC3458082; doi:10.1371/journal.pone.0045782)
Supplement: Supporting Material S4 — The statistics of all conventional features used by previously existing tools. (XLS) [file pone.0045782.s004.xls]

## Sheet: Statistics of Conventional features of miRNA for all species
Statistics of Conventional features of miRNA for all species
Pre-miRNA sequences	GC content	AU content	MFE	Number of bulges	Maximum Bulge size	Mismatches	Length of sequence	Terminal loop length	Stem length
Animal
Homo sapiens	0.49806	0.50194	-40.1792	2.88867	3.916	3.82933	83.878	19.538	32.17
Canis familiaris	0.476211	0.523789	-29.3048	2.74286	3.88571	3.50476	69.127	15.8095	26.6587
Mus musculus	0.490428	0.509572	-36.831	3.43012	4.26459	4.3867	85.4071	19.6621	32.8725
Rattus norvegicus	0.499614	0.500386	-39.5192	3.57248	4.47912	4.87961	90.5971	20.9803	34.8084
Caenorhabditis elegans	0.424565	0.575435	-34.399	3.70909	5.06364	4.42273	89.4864	21.9409	33.7727
Drosophila melanogaster	0.427473	0.572527	-33.0629	4.47699	5.38912	4.61925	94.7155	22.9247	35.8954
*GC content = The average number of G and C nucleotides per length of the sequence
*AU content = The average number of A and U nucleotides per length of the sequence
*MFE = The average Minimum Free energy per length of the sequence
*Number of bulges = The average of total number of bulges in a sequence
*Maximum Bulge Size = The average number of nucleotides in the largest bulge in the sequence
*Length of sequence = The average number of nucleotides present in the sequence
*Terminal Loop length = The average number of nucleotides present in the terminal loop of the sequence
*Stem length = The average number of nucleotides present in the stem region of the sequence
*NA = Sequences Not available

## Sheet: Statistics of Conventional features of different RNA sequences for all species
Statistics of Conventional features of different RNA sequences for all species
rRNA
Animals	GC content	AU content	MFE	Number of bulges	Maximum Bulge size	Mismatches	Length of sequence	Terminal loop length	Stem length
Homo sapiens	0.503035	0.496965	-34.603	7.6862	9.35917	4.12665	113.985	21.8885	46.0482
Canis familiaris	0.501187	0.498624	-34.1738	7.54091	9.71818	4.43636	115.3	23.5818	45.8591
Mus musculus	0.502102	0.497898	-35.4934	7.57864	8.60831	3.92285	113.101	22.0564	45.5223
Rattus norvegicus	0.49649	0.502139	-35.3508	7.53584	9.62457	4.05119	114.423	21.7201	46.3515
Caenorhabditis elegans	0.48085	0.51915	-174.07	40.4091	8.31818	18.9091	518.818	22.6818	248.068
Drosophila melanogaster	0.463829	0.536171	-141.629	34.5688	18.1812	17.0437	500.831	16.65	242.091
snoRNA
Animals	GC content	AU content	MFE	Number of bulges	Maximum Bulge size	Mismatches	Length of sequence	Terminal loop length	Stem length
Homo sapiens	0.432289	0.567711	-28.9371	7.36658	10.6849	3.7358	110.74	17.7358	46.502
Canis familiaris	0.4514	0.5486	-31.2869	7.49022	9.57123	3.82263	109.806	17.5628	46.1215
Mus musculus	0.454376	0.545624	-33.4879	8.03137	10.2137	4.20261	117.822	17.9026	49.9598
Rattus norvegicus	0.454655	0.54525	-33.702	7.96053	10.0018	4.23505	117.798	18.4821	49.6579
Caenorhabditis elegans	0.425013	0.574987	-28.4087	8.07353	9.39706	3.26471	109.757	17.1397	46.3088
Drosophila melanogaster	0.39615	0.60385	-25.9823	7.88664	11.8583	3.77733	114.13	16.7733	48.6781
snRNA
Animals	GC content	AU content	MFE	Number of bulges	Maximum Bulge size	Mismatches	Length of sequence	Terminal loop length	Stem length
Homo sapiens	0.404673	0.595327	-23.6192	6.9098	12.2518	2.90511	108.515	22.1262	43.1942
Canis familiaris	0.4076	0.592323	-25.0877	7.21163	12.2371	2.98759	113.584	23.9484	44.8178
Mus musculus	0.415511	0.584489	-26.3114	7.18398	11.7446	3.07504	112.089	23.1371	44.4762
Rattus norvegicus	0.422914	0.576981	-27.4818	7.31039	11.8366	3.25305	113.556	22.2437	45.6559
Caenorhabditis elegans	0.438042	0.561958	-39.2899	7.87719	12.9386	3.52632	125.675	15.6053	55.0351
Drosophila melanogaster	0.458254	0.541746	-51.7086	11.1429	12.6071	4.60714	161.036	24.25	68.3929
tRNA
Animals	GC content	AU content	MFE	Number of bulges	Maximum Bulge size	Mismatches	Length of sequence	Terminal loop length	Stem length
Homo sapiens	0.560572	0.439428	-26.9181	4.04655	7.83628	2.08668	74.748	14.2343	30.2568
Canis familiaris	NA	NA	NA	NA	NA	NA	NA	NA	NA
Mus musculus	NA	NA	NA	NA	NA	NA	NA	NA	NA
Rattus norvegicus	NA	NA	NA	NA	NA	NA	NA	NA	NA
Caenorhabditis elegans	0.58307	0.41693	-28.9366	3.71217	7.86513	2.06908	74.8438	15.0493	29.8972
Drosophila melanogaster	0.555135	0.444865	-27.8592	3.86901	8.42812	1.85623	75.2524	14.0415	30.6054
Sine/ Alu Sequences
Animals	GC content	AU content	MFE	Number of bulges	Maximum Bulge size	Mismatches	Length of sequence	Terminal loop length	Stem length
Homo sapiens	0.51361	0.48639	-92.2159	17.9443	21.3377	10.9847	262.632	20.1129	121.26
Canis familiaris	NA	NA	NA	NA	NA	NA	NA	NA	NA
Mus musculus	NA	NA	NA	NA	NA	NA	NA	NA	NA
Rattus norvegicus	NA	NA	NA	NA	NA	NA	NA	NA	NA
Caenorhabditis elegans	NA	NA	NA	NA	NA	NA	NA	NA	NA
Drosophila melanogaster	NA	NA	NA	NA	NA	NA	NA	NA	NA
Pseudohairpin sequences (200bp)
Animals	GC content	AU content	MFE	Number of bulges	Maximum Bulge size	Mismatches	Length of sequence	Terminal loop length	Stem length
Homo sapiens	0.540915	0.459085	-65.7949	13.0706	12.0238	7.62304	200	35.3538	82.3231
Canis familiaris	0.556305	0.443436	-66.4897	13.3079	11.6256	7.9647	200	35.7044	82.1478
Mus musculus	0.570701	0.429019	-67.8178	13.3988	11.243	7.56075	200	37.9439	81.028
Rattus norvegicus	0.507262	0.492738	-58.7473	13.6786	12.9702	7.16071	200	36.0417	81.9792
Caenorhabditis elegans	0.367576	0.632424	-40.439	12.9909	14.5549	5.40854	200	37.5	81.25
Drosophila melanogaster	0.492448	0.507552	-54.8593	13.4715	13.4637	6.87306	200	34.399	82.8005
*GC content = The average number of G and C nucleotides per length of the sequence
*AU content = The average number of A and U nucleotides per length of the sequence
*MFE = The average Minimum Free energy per length of the sequence
*Number of bulges = The average of total number of bulges in a sequence
*Maximum Bulge Size = The average number of nucleotides in the largest bulge in the sequence
*Length of sequence = The average number of nucleotides present in the sequence
*Terminal Loop length = The average number of nucleotides present in the terminal loop of the sequence
*Stem length = The average number of nucleotides present in the stem region of the sequence
*NA = Sequences Not available
										90.6936
										90.6459
										90.1996
										90.47
